# Supplementary material for: Brazilian Foodborne Disease National Survey: Evaluating the Landscape after 11 Years of Implementation to Advance Research, Policy, and Practice in Public Health
Source: PubMed Central journal article supplement (PMC6356215; doi:10.3390/nu11010040), 2018-12-25
Supplement: nutrients-11-00040-s001.pdf [file nutrients-11-00040-s001.pdf]

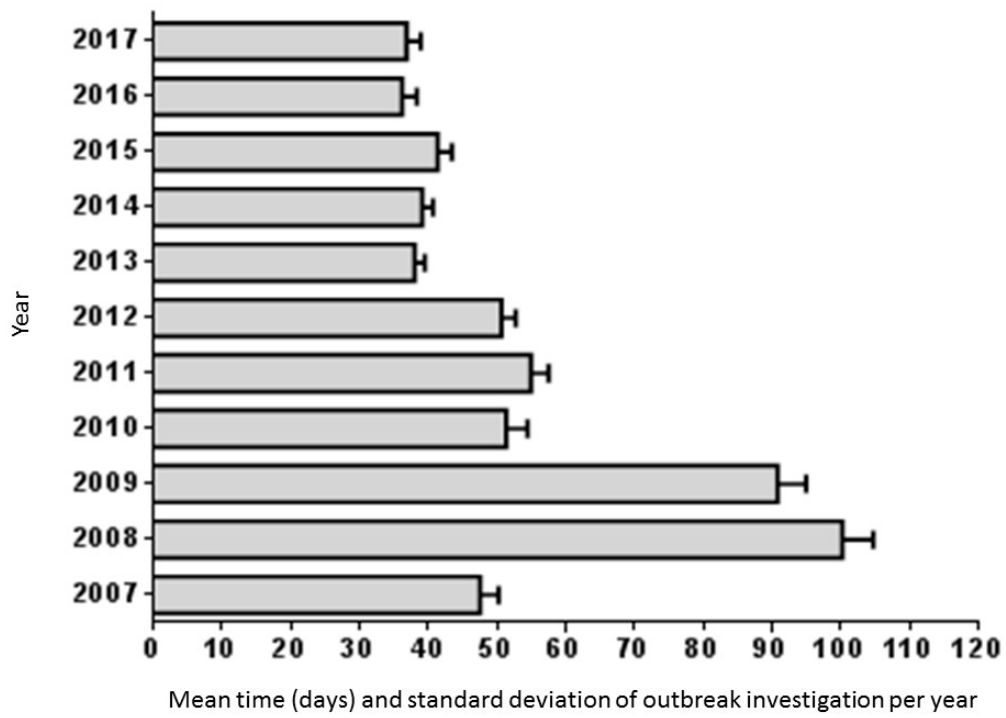

Figure S1: Mean time and standard deviation of outbreak investigation between the years 2007 and 2017
